# Adrenal Incidentalomas are Tied to Increased Risk of Diabetes: Findings from a Prospective Study

Giuseppe Reimondo,<sup>1,†</sup> Elena Castellano,<sup>2,†</sup> Maurizio Grosso,<sup>3</sup> Roberto Priotto,<sup>3</sup> Soraya Puglisi,<sup>1</sup> Anna Pia,<sup>1</sup> Micaela Pellegrino,<sup>2</sup> Giorgio Borretta,<sup>2,‡</sup> and Massimo Terzolo<sup>1,‡</sup>

<sup>1</sup>Internal Medicine, Department of Clinical and Biological Sciences, San Luigi Gonzaga Hospital, University of Turin, Orbassano, Turin, Italy 10043; <sup>2</sup>Division of Endocrinology, Diabetes, and Metabolism, Santa Croce and Carle, Cuneo, Italy 12100; and <sup>3</sup>Department of Radiology, Santa Croce and Carle, Cuneo, Italy 12100

**Context:** The frequency of adrenal incidentalomas and their association with comorbid conditions have been assessed mostly in retrospective studies that may be prone to ascertainment bias.

**Objective:** The objective of this work is to evaluate the frequency of adrenal incidentalomas and their associated comorbid conditions.

**Design:** A prospective cohort study was conducted.

**Setting:** This study took place at a radiology department at a public hospital.

**Participants:** Unselected outpatients who underwent an abdominal computed tomography (CT) from January 2017 to June 2018. Patients with known or suspected adrenal disease or malignancy were excluded.

**Exposure:** All abdominal CT scans were evaluated by an experienced radiologist. Hormonal workup including a 1-mg dexamethasone suppression test was performed in patients bearing adrenal incidentalomas.

**Main Outcome and Measure:** Frequency of adrenal incidentalomas in abdominal CT of unselected patients; frequency of comorbid conditions, and hormonal workup in patients bearing adrenal incidentalomas.

**Results:** We recruited 601 patients, and in 7.3% of them an adrenal tumor was found serendipitously. The patients bearing an adrenal incidentaloma had higher body mass index ( $P = .009$ ) and waist circumference ( $P = .004$ ) and were more frequently diabetic ( $P = .0038$ ). At multivariable regression analysis, diabetes was significantly associated with the presence of adrenal incidentalomas ( $P = .003$ ). Autonomous cortisol secretion was observed in 50% of patients who did not suppress cortisol less than 50 nmol/L after 1 mg dexamethasone.

**Conclusions:** The frequency of adrenal incidentalomas is higher than previously reported. Moreover, adrenal incidentalomas are tied to increased risk of type 2 diabetes. This finding is free from ascertainment bias because patients with adrenal incidentalomas were drawn from a prospective cohort with the same risk of diabetes as the background population. (*J Clin Endocrinol Metab* 105: e973–e981, 2020)

**Key words:** adrenal tumor, incidentaloma, prevalence, Cushing, diabetes

ISSN Print 0021-972X ISSN Online 1945-7197

Printed in USA

© Endocrine Society 2020. All rights reserved. For permissions, please e-mail: journals.permissions@oup.com

Received 17 September 2019. Accepted 18 December 2019.

First Published Online 4 January 2020.

Corrected and Typeset 17 March 2020.

<sup>†</sup>G.R. and E.C. are co-first authors of this work.

<sup>‡</sup>G.B. and M.T. are co-senior authors of this work.

Abbreviations: ACTH, adrenocorticotropin hormone; BMI, body mass index; CT, computed tomography; CV, cardiovascular; DHEA-S, dehydroepiandrosterone sulfate; DST, dexamethasone suppression test; ESE/ENSAT, European Society of Endocrinology and the European Network for the Study of Adrenal Tumors; HbA<sub>1c</sub>, glycosylated hemoglobin.

**A**drenal tumors are among the most common neoplasms in humans, and the widespread use of high-resolution cross-sectional imaging in medical practice has increased the frequency of their detection, which in most cases occurs serendipitously as adrenal incidentalomas. These tumors are unexpectedly found in patients who undergo abdominal scanning for reasons unrelated to any previously suspected adrenal disease.

The frequency of adrenal incidentalomas in computed tomography (CT) series assessed in the 1980s and 1990s ranged from 0.35% to 1.9% (1–6). In 2006, we reported a frequency of 4.4% in a sample of 520 individuals at risk of lung cancer who volunteered for CT screening (7), and more recent studies have confirmed a frequency of about 5% (8). This greater frequency of detection is most likely thanks to the improved resolution of modern imaging.

Most adrenal incidentalomas are benign cortical adenomas that may have secretory activity, although patients do not present with the classic stigmata of adrenal steroid excess. In 20% to 30% of adrenal incidentalomas, an autonomous cortisol secretion is found that may have clinical consequences (9–12). To standardize and simplify heterogeneous clinical practice, the European Society of Endocrinology and the European Network for the Study of Adrenal Tumors (ESE/ENSAT) guidelines recommended a 1-mg overnight dexamethasone suppression test (DST) to exclude cortisol excess (10). Cortisol levels following DST less than 50 nmol/L (1.8 µg/dL) exclude autonomous cortisol secretion, whereas levels greater than 138 nmol/L (5.0 µg/dL) should be considered as evidence of autonomous cortisol secretion, and levels between the 2 cutoff points as evidence of possible autonomous cortisol secretion (10).

Autonomous cortisol secretion has been defined as subclinical Cushing syndrome or subclinical hypercortisolism and represents the lower end of the Cushing syndrome spectrum. An increasing body of evidence suggests that is associated with metabolic and cardiovascular (CV) diseases that may eventually result in excess mortality (13–19).

It is biologically plausible that chronic exposure to low-grade cortisol excess resulting from autonomous adrenal secretion has clinical consequences, but previous studies are mostly retrospective and cannot definitively establish a cause and effect relationship. An inherent bias of these studies is that diseased individuals are more likely to undergo imaging examinations than healthy ones, and therefore the association between adrenal incidentalomas and diseases such as diabetes, hypertension, and metabolic syndrome may to some extent be explained by an ascertainment bias (20).

Thus, we were prompted to conduct a prospective assessment of patients undergoing abdominal CT examinations at a single radiologic unit, with the following aims: i) to evaluate the frequency of adrenal incidentalomas in an unselected population consecutively recruited; ii) to evaluate whether patients bearing adrenal incidentalomas present more comorbid conditions and increased CV risk than patients without adrenal tumors; and iii) to evaluate the presence of autonomous cortisol secretion, as defined by the ESE/ENSAT guidelines (10), and its eventual association with comorbid conditions.

## Participants and Methods

We conducted a prospective study at the radiology department of the S. Croce e Carle Hospital in Cuneo, Italy, between January 2017 and June 2018, on a consecutive series of outpatients who were required to undergo abdominal CT examinations as part of their management. One endocrinologist (E.C.) attended the radiology department one day per week to recruit potentially eligible participants, explaining the purpose of the study and interviewing patients. Those with any history of adrenal disease, malignancy, major psychiatric disorder, or who were on previous or current steroid treatment, or any drug (including estrogens) known to interfere with steroid hormone secretion and metabolism, were considered noneligible. We also excluded patients who underwent CT for oncological screening or suspected cancer. All the study procedures were approved by our institutional research and ethics review board and all the patients included in the study provided written informed consent.

The height (cm) and weight (kg) of the patients, in light clothing and without shoes, were measured using the same device. Body mass index (BMI [kg/m<sup>2</sup>]) was then calculated and a BMI of greater than 30 kg/m<sup>2</sup> was considered evidence of obesity. Participants were considered to have abdominal obesity if their waists were greater than 102 cm for men or greater than 85 cm for women. Blood pressure (mm Hg) was recorded twice using a mercury manometer in a sitting position after the patient rested for more than 15 minutes, and the average value was calculated. Hypertension was defined as blood pressure greater than 140/90 mm Hg, or current use of antihypertensive medications. Diabetes mellitus was defined when the patient reported fasting glycemia 7 mmol/L or greater, glycemia at 2 hours during oral glucose tolerance test 11.1 mmol/L or greater, glycated hemoglobin level (HbA<sub>1c</sub>) 6.5% or greater, previous diagnosis of diabetes, or current use of antidiabetic medications. Dyslipidemia was defined

by the current use of cholesterol-lowering medications. Any history of cerebrovascular or CV disease (transient ischemic attack, stroke, angina pectoris, myocardial infarction, or revascularization procedures) was carefully established. Current smoking was defined as smoking at least 1 cigarette per day in the past 12 months. We classified women as menopausal if their final menstrual period had occurred more than 12 months before.

All abdominal CT scans were evaluated by an experienced radiologist (M.G.), who reported the presence and number of adrenal tumors and their characteristics (largest size, margins, mass texture, and attenuation index, which are described as Hounsfield units [HU]). The minimal size of adrenal lesions to be considered as incidentalomas was 10 mm or greater. In case of multiple lesions, the characteristics of the largest lesion were used for analysis. CT examinations were performed with a Brilliance 64 scan (Philips). The technical parameters of CT acquisition were adjusted according to the clinical request for the CT scan and to patient body size. The section thickness was 2.5 mm. A helicoidal scan was carried out with 120 kV, 300 mAs, a rotation time of 0.42 seconds, and a pitch of 1.375. In the event of finding an adrenal mass, a multiplanar reconstruction of the whole tumoral area in the sagittal, coronal, and oblique planes was performed, with a thickness and reconstruction interval of 1 mm, instead of 2.5 mm used in the initial CT evaluation. Radiologists reported the maximal density observed in the region of interest.

The patients bearing adrenal incidentalomas underwent further workup, including routine biochemical assessment, plasma fractionated metanephrines, adrenocorticotropin hormone (ACTH), dehydroepiandrosterone sulfate (DHEA-S), and a 1-mg overnight dexamethasone suppression test (DST). Plasma renin activity and aldosterone were evaluated in hypertensive patients. Blood samples were obtained in the morning after overnight fasting. Hormonal determinations were conducted in a single laboratory with routinely available reagents. In particular, serum cortisol concentrations were measured using a chemiluminescence immunoassay (CLIA, Siemens), with an interassay and intra-assay coefficient of variation of 3.7% to 4.2% and 4.4% to 6.0%, respectively. DHEA-S concentrations were measured using a chemiluminescence immunoassay (CLIA, Siemens), with an interassay and intra-assay coefficient of variation of 4.0% to 5.6% and 1.6% to 2.5%, respectively. ACTH concentrations were measured using a CLIA (Diasorin), with an interassay and intra-assay coefficient of variation of 2.6% to 5.5% and 2.7% to 4.3%, respectively.

## Statistical analysis

Variables were preliminarily tested for normal distribution with the Shapiro-Wilk W test and data were expressed as mean  $\pm$  SD, or median and interquartile range, as appropriate. Continuous variables were compared by the Student t test assuming equal or nonequal variance with the Leneve test. Categorical variables were compared by the chi-square test or Fisher exact tests. Two separate sets of linear regressions were conducted, and the presence of an adrenal incidentaloma was set as the dependent variable. The first set was univariate, and the second included all the variables whose  $\beta$  coefficient was significant in the univariate analysis. In the case of multiple independent variables, a multicollinearity test was performed. Variables were rejected from the analysis if there was a variance inflation factor greater than 2. All statistical analyses were performed using SPSS (IBM SPSS Statistics, version 21). The level of statistical significance was set at *P* less than .05.

## Results

A total of 601 patients were recruited (331 male and 270 female), age  $63.5 \pm 14.4$  years. They underwent CT imaging for the following reasons: urological evaluation (25.4%); varying abdominal symptoms (25.1%); virtual colonoscopy (18%); alteration in liver function tests (4.3%); alteration in pancreatic enzymes (2.8%); abdominal pain (18%); angiographic studies (16%); hematochezia (6.5%); and other reasons (9%).

The demographic, clinical, and biochemical features of the whole series are summarized in Table 1. The demographic characteristics of our cohort are comparable to those of 1332 nononcologic patients undergoing CT examinations at the same radiology department over a

**Table 1. Baseline features of patients**

| <b>N = 601</b>                 |                 |
|--------------------------------|-----------------|
| Male sex                       | 331 (55.1)      |
| Age, y                         | $63.5 \pm 14.4$ |
| BMI                            | $25.4 \pm 4.9$  |
| Waist, cm                      | $93.1 \pm 13.9$ |
| Menopausal status <sup>a</sup> | 208 (77)        |
| Smoking                        | 132 (22)        |
| Hypertension                   | 335 (55.4)      |
| Type 2 diabetes                | 93 (15.5)       |
| HbA <sub>1c</sub> , %          | $7.5 \pm 1.93$  |
| Dyslipidemia                   | 104 (17.3)      |
| History of CV events           | 102 (17)        |

Data are expressed as mean  $\pm$  SD or as absolute value and percentage as appropriate.

Abbreviations: BMI, body mass index; CV, cardiovascular; HbA<sub>1c</sub>=glycosylated hemoglobin.

<sup>a</sup>Menopausal status refers to women only.

<sup>b</sup>HbA<sub>1c</sub> values refer to 90 diabetic patients.

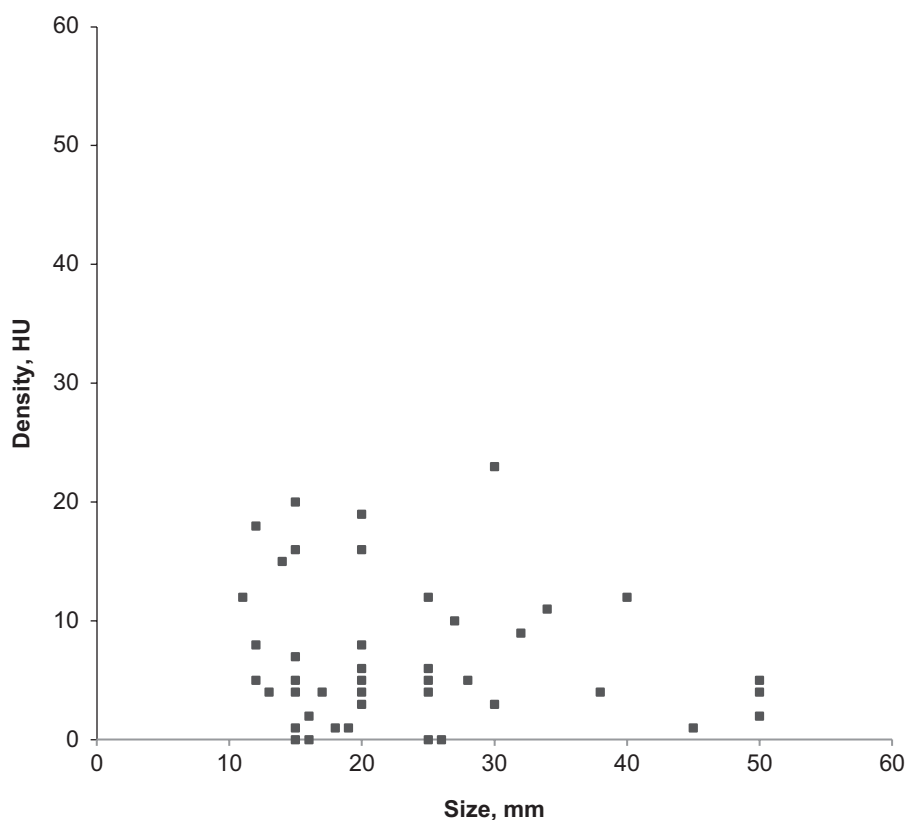

**Figure 1.** Scatterplot of the density (HU) and size (mm) of adrenal adenomas.

12-month period (male, 62.2%; age,  $67.9 \pm 13.2$  years). In terms of clinical characteristics, 55.4% of our patients had hypertension, 15.5% had diabetes, 17.3% dyslipidemia, and 17% a history of previous CV events. The frequency of diabetes in the study cohort was comparable to that of the general population of the region, which is Piedmont (21, 22).

An adrenal tumor was found serendipitously in 44 patients (7.3%). These were 32 men and 12 women age  $65.6 \pm 10.3$  years. The mass size ranged between 10 and 50 mm (median 21 mm) and the tumors were bilateral in 29.5% of patients. In a single case that showed indeterminate features, which was 4 cm in size with a density of 30 HU, plasma metanephrine levels were greater than 2 times the upper limit of normality, and histology confirmed a diagnosis of pheochromocytoma. The radiological reassessment using a dedicated protocol of the 43 adrenal adenomas led to detection of 11 tumors (25.6%) with a density ranging from 11 HU to 24 HU (Fig. 1). In 9 of these patients, a second CT was performed after 3 to 12 months, and radiological characteristics of the tumors remained unchanged. Thirty-two tumors had the radiological features of benign cortical adenoma (density  $\leq 10$  HU).

A comparison between patients with and without adrenal incidentalomas is given in Table 2. In summary, the patients bearing an adrenal incidentaloma were more

frequently male, had higher BMI ( $P = .009$ ) and larger waists ( $P = .007$ ), and were more frequently diabetic ( $P = .0038$ ) (Table 2). The overall distribution of patients with adrenal incidentalomas by age decades was not fully linear with that of diabetic patients with adrenal incidentalomas (Fig. 2), and the age of patients bearing adrenal incidentalomas with or without diabetes did not differ significantly ( $69.9 \pm 7.1$  years vs  $63.6 \pm 11.0$  years;  $P = \text{NS}$ ). In the multivariable regression analysis, diabetes was significantly associated with the presence of adrenal incidentalomas ( $P = .003$ ) (Table 3). A 1-mg DST was conducted on 40 of the patients, and 20 (50%) did not suppress cortisol less than 50 nmol/L, whereas 4 had post-DST cortisol greater than 138 nmol/L. A comparison between patients stratified by post-DST cortisol less than 50 nmol/L and 50 nmol/L or greater is provided in Table 4. In summary, no significant difference was found in the demographic and clinical characteristics between the 2 groups, but the size of the dominant nodule was significantly larger in patients with post-DST cortisol 50 nmol/L or greater ( $P = .012$ ). The difference in mass size was not significantly different when considering the sum of sizes in the event of multiple nodules ( $31.6 \pm 16.0$  mm vs  $26.2 \pm 14.4$  mm;  $P = \text{NS}$ ). DHEA-S and ACTH concentrations were lower in patients with post-DST cortisol 50 nmol/L or greater; however, levels of statistical significance were not attained.

**Table 2. Comparison between patients with and without adrenal incidentalomas**

|                                    | Patients With Adrenal Incidentalomas (N = 44) | Patients Without Adrenal Incidentalomas (N = 557) | P           |
|------------------------------------|-----------------------------------------------|---------------------------------------------------|-------------|
| Male sex                           | 32 (72.7)                                     | 299 (53.7)                                        | <b>.02</b>  |
| Age, y                             | 65.6 ± 10.3                                   | 63.3 ± 14.7                                       | .40         |
| BMI                                | 27.6 ± 6.2                                    | 25.6 ± 4.8                                        | <b>.009</b> |
| Waist, cm                          | 101.2 ± 13.9                                  | 92.7 ± 13.9                                       | <b>.007</b> |
| Hypertension                       | 28 (63.6)                                     | 307 (55.1)                                        | .29         |
| Type 2 diabetes                    | 14 (31.8)                                     | 79 (14.2)                                         | <b>.004</b> |
| HbA <sub>1c</sub> <sup>a</sup> , % | 7.8 ± 2.9                                     | 7.2 ± 2.6                                         | .14         |
| Dyslipidemia                       | 11 (25)                                       | 93 (16.7)                                         | .23         |
| History of CV events               | 7 (16.3)                                      | 95 (17.1)                                         | .99         |

Data are expressed as mean ± SD or as absolute value and percentage as appropriate. Bold character indicates statistically significant values.

Abbreviations: BMI, body mass index; CV, cardiovascular; HbA<sub>1c</sub> = glycosylated hemoglobin.

<sup>a</sup>HbA<sub>1c</sub> values refer to 14 diabetic patients with adrenal incidentalomas and 76 diabetic patients without adrenal incidentalomas.

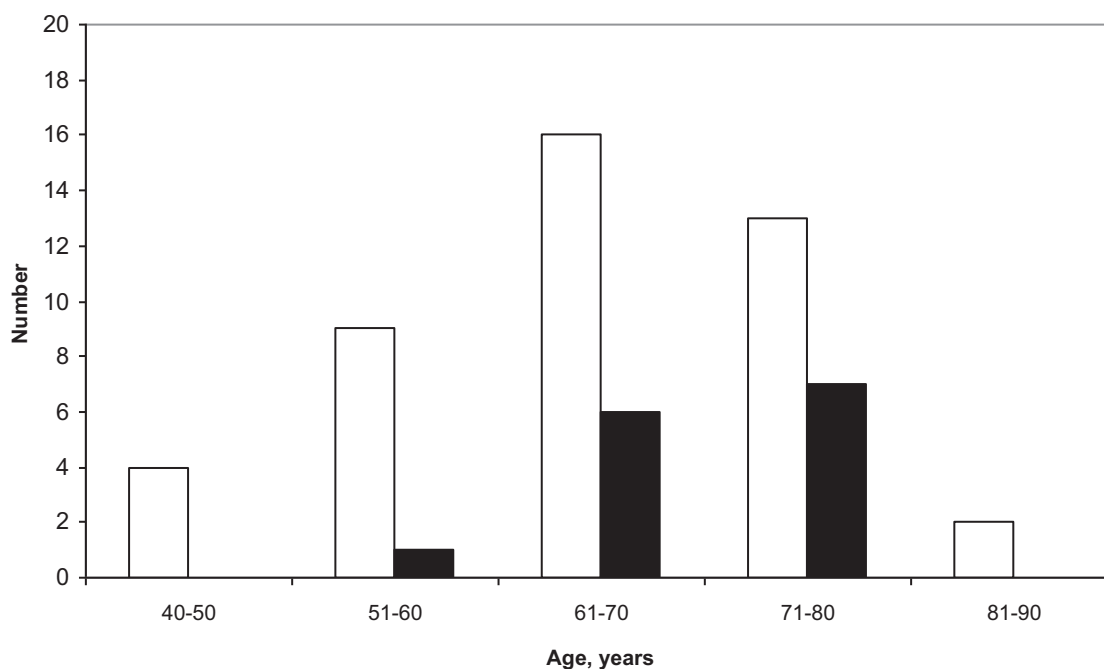

**Figure 2.** Distribution of patients with adrenal adenomas (white bars) and patients with adrenal adenomas and diabetes (black bars) by age decades.

**Table 3. Multivariable regression analysis of features associated with presence of adrenal incidentaloma**

| N = 44          |              |             |
|-----------------|--------------|-------------|
|                 | β Value      | P           |
| Male sex        | 0.053        | .22         |
| Smoking         | 0.082        | .06         |
| BMI             | 0.016        | .72         |
| Type 2 diabetes | <b>0.131</b> | <b>.003</b> |

Abbreviation: BMI, body mass index.

## Discussion

The present study demonstrates that the frequency of adrenal incidentalomas in a prospective series of

patients is 7.3%, which is higher than previously reported (Table 5)(1–8, 23–25). It is important to note that we assessed outpatients without any history of adrenal diseases or malignancy, so we may conclude that this series is unselected, as far as can be assumed for patients under diagnostic evaluation.

The frequency of adrenal incidentalomas identified in published studies is highly variable because it is dependent on the clinical context, patient characteristics (mainly oncological patients or individuals with known endocrine diseases have been included), and the technology used. The data obtained by first-generation CT scans showed a very low prevalence of about 0.6% (26). In the following decade, the introduction of more advanced CT scans resulted in an increased frequency of



**Table 4. Comparison between patients with cortisol levels after 1 mg dexamethasone suppression less than 50 or 50 nmol/L or greater**

|                                                | Patients With Cortisol Levels After<br>1 mg Dexamethasone Suppression<br>< 50 nmol/L<br>(N = 20) | Patients With Cortisol Levels After<br>1 mg Dexamethasone Suppression<br>≥ 50 nmol/L<br>(N = 20) | P          |
|------------------------------------------------|--------------------------------------------------------------------------------------------------|--------------------------------------------------------------------------------------------------|------------|
| Male sex, No. (%)                              | 16 (80)                                                                                          | 14 (70)                                                                                          | .47        |
| Age, y (mean ± SD)                             | 62.6 ± 8.2                                                                                       | 67.5 ± 9.5                                                                                       | .43        |
| BMI (median ± SD)                              | 26.9 ± 5.6                                                                                       | 28.5 ± 6.9                                                                                       | .75        |
| Hypertension, No. (%)                          | 9 (45)                                                                                           | 15 (75)                                                                                          | .05        |
| Diabetes, No. (%)                              | 6 (30)                                                                                           | 7 (35)                                                                                           | .74        |
| HbA <sub>1c</sub> , % (mean ± SD) <sup>a</sup> | 7.1 ± 1.8                                                                                        | 8.9 ± 3.8                                                                                        | .11        |
| Dyslipidemia, No. (%)                          | 3 (15)                                                                                           | 6 (30)                                                                                           | .26        |
| History of CV events,<br>No. (%)               | 2 (10)                                                                                           | 4 (20)                                                                                           | .38        |
| Size of dominant<br>nodule, mm                 | 19.8 ± 7.6                                                                                       | 27.4 ± 12.9                                                                                      | <b>.01</b> |
| ACTH, pmol/L                                   | 3.5 ± 1.5                                                                                        | 2.9 ± 1.8                                                                                        | .11        |
| DHEA-S, μmol/L                                 | 1.9 ± 1.1                                                                                        | 1.7 ± 1.0                                                                                        | .74        |

Data are expressed as mean ± SD or as absolute value and percentage as appropriate.

Abbreviations: ACTH, adrenocorticotropic hormone; BMI, body mass index; CV, cardiovascular; DHEA-S, dehydroepiandrosterone sulfate; HbA<sub>1c</sub> = glycosylated hemoglobin.

<sup>a</sup>HbA<sub>1c</sub> values refer to diabetic patients only.

about 4%, but different criteria were used and either oncological patients or individuals with a known diagnosis of hypercortisolism were included (7, 23, 24). More recent studies have shown that adrenal masses can be found in up to 10% of patients with lung cancer (27). Interestingly, a large study involving all hospitals in Western Sweden reported that the frequency increased from only 0.9% at the first radiological evaluation to 4.5% after a central radiologic revision (23). This suggests the possibility of an underestimation when the evaluation is not carried out by experienced radiologists. The difference was striking, particularly when thoracic CT (extended to the upper abdomen) was considered (23). We found a frequency of bilateral adrenal adenomas of 29.5%, a figure that is higher than previously reported. In the literature, the frequency of bilateral adrenal masses (not only adenomas) ranged from 0% to 25.1% (2, 7, 8, 23–25, 28, 29). Our study highlights also the importance of a dedicated reassessment of CT images of any adrenal mass found with a standard radiologic protocol. Interestingly, a previous study employing central revision of CT images reported a frequency of bilateral masses like the present one (25.1%) (23). In our study, a thickness and reconstruction interval of 1 mm of the whole tumoral area allowed for a more precise assessment of mass density, showing that 25.6% of adrenal adenomas present with unenhanced density between 10 HU and 24 HU (Fig. 1). Previous studies reported variable estimates, ranging from 12% to 55% (8, 29).

The strength of our study is that the patients were assessed prospectively in a single center, only those

referred for abdominal CT were selected, and patients with known or suspected cancer were excluded. The improved methodology in our study (ie, the revision of all scans by experienced radiologists) could explain the higher frequency than reported in previous studies, with a figure that is close to that of autopsy series. The highest prevalence reported in autopsy series is about 9%, although significant discrepancies of the reported data can occur, depending on the ability to distinguish between hyperplasia and small nodules (26).

The age pattern in our series is similar to those found in previous studies, but the sex distribution differs. We have observed a male predominance, whereas the bulk of evidence suggests a higher frequency of adrenal incidentalomas in women (5, 23). The only findings in agreement with ours are from the recent COAR study (28), which reports a male to female ratio of 1.35. Our assumption is that the specific-sex distribution in our study reflects the characteristics of the overall population from which the series was derived because a similar sex ratio was found in the population undergoing CT examinations at the radiology department where the study was conducted.

A major finding of our study is that adrenal incidentalomas are associated with a higher risk of type 2 diabetes. The patients bearing adrenal incidentalomas have higher BMIs and larger waists, which is consistent with a higher frequency of diabetes. Because the prevalence of either type 2 diabetes or adrenal incidentalomas increases with age, it may be speculated that their association is an effect of aging. However, the correlation between the frequency of adrenal incidentalomas,

**Table 5. Frequency of adrenal incidentalomas in CT scan series**

| Study                  | Study Period      | Patients, No. | Age at Diagnosis, y | Female Sex, % | Type of CT             | Frequency of Adrenal Incidentalomas, % | Mass size, mm | Bilateral mass, % |
|------------------------|-------------------|---------------|---------------------|---------------|------------------------|----------------------------------------|---------------|-------------------|
| Glazer, 1982 (1)       | NA                | 2200          | NA                  | NA            | NA                     | 0.6                                    | NA            | NA                |
| Prinz, 1982 (2)        | 1981              | 1423          | 41-73               | 44.4          | Abdominal              | 0.6                                    | 10-40         | 0                 |
| Abecassis, 1985 (3)    | 1983-1985         | 1459          | NA                  | NA            | NA                     | 1.3                                    | NA            | NA                |
| Belldegrun, 1986 (4)   | 1976-1983         | 12 000        | NA                  | NA            | Abdominal              | 0.7                                    | NA            | NA                |
| Herrera, 1991 (5)      | 1985-1989         | 61 054        | 62                  | 60.2          | NA                     | 0.4                                    | 25, (10-110)  | NA                |
| Caplan, 1994 (6)       | NA                | 1779          | NA                  | NA            | NA                     | 1.90                                   |               | NA                |
| Song, 2008 (8)         | Jan 2000-Dec 2003 | 65 231        | 64, (19-100)        | NA            | Abdominal and thoracic | 1.5                                    | 20, (4-82)    | 7.8               |
| Hammarstedt, 2010 (23) | Oct 2002-Apr 2004 | 34 044        | 69, (30-94)         | 56.9          | Abdominal and thoracic | 4.5                                    | 25.8, (8-94)  | 25.1              |
| Bovio, 2006 (7)        | Apr 2001-Dec 2001 | 520           | 58, (50-79)         | 26.1          | Chest scan             | 4.4                                    | 12-38         | 13.2              |
| Davenport, 2011 (25)   | Jan 2006-Dec 2007 | 3099          | 68, (45-92)         | 46            | Abdominal and thoracic | 0.98 abdomen<br>0.81 thorax            | 26 ± 12       | 2.7               |
| Grossman, 2016 (24)    | NA                | 673           | 50.93 ± 11.1        | NA            | Abdominal CT           | 4.2                                    | NA            | 11                |
| Present study          | Jan 2017-Jun 2018 | 601           | 65.6 ± 10.3         | 27.3          | Abdominal CT           | 7.3                                    | 21, (10-50)   | 29.5              |

Range in parentheses indicates the minimum value and the maximum value of the sample.

Abbreviations: CT, computed tomography; NA, not available.

diabetes, and age was not fully linear. Moreover, patients with adrenal incidentalomas were not older than patients without, and age did not differ between patients bearing adrenal incidentalomas with or without diabetes.

The novelty of our findings is that our cohort was unselected; thus, to the best of our knowledge, this is the first unbiased demonstration of a link between adrenal incidentalomas and type 2 diabetes. Discovering adrenal masses in diabetic patients is more likely because they are more extensively studied and followed because of their disease and accompanying comorbidities (20), but this potential limitation does not apply to our study. Our study cohort, from which patients with adrenal incidentalomas were drawn, was composed of outpatients who showed a prevalence of diabetes comparable with the background population of our region (21).

The present data provide strong evidence to support the view that patients with adrenal incidentalomas have a worse metabolic profile, which is associated with increased CV risk (13–16, 18). The observation that diabetes was an independent predictor of the presence of adrenal tumors points to the relationship with insulin resistance, which may be bidirectional, as recently argued by Sydney et al (30). An adrenal adenoma may be a possible cause of insulin resistance and metabolic

syndrome (14), but insulin resistance by itself may facilitate the occurrence of adrenal tumors (31, 32).

It is well recognized that type 2 diabetes mellitus represents a risk factor for different cancer types (30), through pathways including the production of tumor necrosis factor- $\alpha$  by adipose tissue (33), hyperinsulinemia, and hyperglycemia (34,35).

In terms of the assessment of cortisol secretion, we confirm that approximately half the patients with adrenal incidentalomas have possible autonomous cortisol secretion, according to the definition in the ESE/ENSAT guidelines (10). Owing to the small subgroups, we were not able to separately consider patients with definitive autonomous cortisol secretion, and we compared only 2 groups stratified by post-DST cortisol of 50 nmol/L, and found no difference in the comorbidity burden between them.

The possibility that even nonfunctioning adrenal incidentalomas may predict an increased risk of diabetes has been proposed by Lopez and colleagues (36), who demonstrated in a longitudinal retrospective study how the frequency of incident diabetes found during follow-up was higher for patients with nonsecretory tumors than for those without. More recent studies have suggested that the lack of autonomous cortisol secretion does not exclude an adverse metabolic and CV profile (13, 30, 37).

A recent meta-analysis assessing morbidity and mortality in patients with adrenal incidentalomas found that diabetes was twice as frequent in patients with autonomous cortisol excess than in patients with nonsecretory tumors, although the latter still had a frequency of diabetes higher than the general population (38).

We have shown in a contemporary and prospective radiological series that the frequency of unsuspected adrenal tumors (adrenal incidentalomas) is higher than previously reported. In addition, the findings support the association between adrenal incidentalomas and type 2 diabetes. Although this has previously been identified (39), a strength of the present study is that our findings are free from ascertainment bias because patients with adrenal incidentalomas were drawn from a cohort of outpatients showing a risk of diabetes comparable with the background population of our region. The prospective recruitment of our series, and the fact that it was not enriched a priori by diabetic patients, provides strong support to the concept. We acknowledge the limitation that because of the small sample size of adrenal tumors, the subgroup analysis was not able to establish whether autonomous cortisol secretion has a role in this association. However, the present study provides evidence for a better understanding of whether adrenal incidentalomas are associated with comorbid conditions. Given the frequency of adrenal incidentalomas, which in the present series was even higher than previously thought, the issue is of importance for public health.

## Acknowledgments

**Financial Support:** This research was funded by Fondazione Cassa di Risparmio di Cuneo (IT), ID ROLL 2014/13249.

## Additional Information

**Correspondence:** Soraya Puglisi, MD, Internal Medicine, Department of Clinical and Biological Sciences, San Luigi Gonzaga Hospital, Regione Gonzole 10, 10043 Orbassano, Turin, Italy. E-mail: [sorayapuglisi@yahoo.it](mailto:sorayapuglisi@yahoo.it).

**Disclosure Summary:** The authors have nothing to disclose.

**Data availability:** The datasets generated during and/or analyzed during the current study are not publicly available but are available from the corresponding author on reasonable request.

## References

- Glazer HS, Weyman PJ, Sagel SS, Levitt RG, McClennan BL. Nonfunctioning adrenal masses: incidental discovery on computed tomography. *AJR Am J Roentgenol*. 1982;139(1):81–85.
- Prinz RA, Brooks MH, Churchill R, et al. Incidental asymptomatic adrenal masses detected by computed tomographic scanning. Is operation required? *JAMA*. 1982;248(6):701–704.
- Abecassis M, McLoughlin MJ, Langer B, Kudlow JE. Serendipitous adrenal masses: prevalence, significance, and management. *Am J Surg*. 1985;149(6):783–788.
- Belldgrun A, Hussain S, Seltzer SE, Loughlin KR, Gittes RF, Richie JP. Incidentally discovered mass of the adrenal gland. *Surg Gynecol Obstet*. 1986;163(3):203–208.
- Herrera MF, Grant CS, van Heerden JA, Sheedy PF, Ilstrup DM. Incidentally discovered adrenal tumors: an institutional perspective. *Surgery*. 1991;110(6):1014–1021.
- Caplan RH, Strutt PJ, Wickus GG. Subclinical hormone secretion by incidentally discovered adrenal masses. *Arch Surg*. 1994;129(3):291–296.
- Bovio S, Cataldi A, Reimondo G, et al. Prevalence of adrenal incidentaloma in a contemporary computerized tomography series. *J Endocrinol Invest*. 2006;29(4):298–302.
- Song JH, Chaudhry FS, Mayo-Smith WW. The incidental adrenal mass on CT: prevalence of adrenal disease in 1,049 consecutive adrenal masses in patients with no known malignancy. *AJR Am J Roentgenol*. 2008;190(5):1163–1168.
- Terzolo M, Stigliano A, Chiodini I, et al; Italian Association of Clinical Endocrinologists. AME position statement on adrenal incidentaloma. *Eur J Endocrinol*. 2011;164(6):851–870.
- Fassnacht M, Arlt W, Bancos I, et al. Management of adrenal incidentalomas: European Society of Endocrinology Clinical Practice Guideline in collaboration with the European Network for the Study of Adrenal Tumors. *Eur J Endocrinol*. 2016;175(2):G1–G34.
- Reimondo G, Puglisi S, Pia A, Terzolo M. Autonomous hypercortisolism: definition and clinical implications. *Minerva Endocrinol*. 2019;44(1):33–42.
- Puglisi S, Perotti P, Pia A, Reimondo G, Terzolo M. Adrenocortical carcinoma with hypercortisolism. *Endocrinol Metab Clin North Am*. 2018;47(2):395–407.
- Sbardella E, Minnelli M, D'Aluisio D, et al. Cardiovascular features of possible autonomous cortisol secretion in patients with adrenal incidentalomas. *Eur J Endocrinol*. 2018;178(5):501–511.
- Terzolo M, Pia A, Ali A, et al. Adrenal incidentaloma: a new cause of the metabolic syndrome? *J Clin Endocrinol Metab*. 2002;87(3):998–1003.
- Morelli V, Reimondo G, Giordano R, et al. Long-term follow-up in adrenal incidentalomas: an Italian multicenter study. *J Clin Endocrinol Metab*. 2014;99(3):827–834.
- Terzolo M, Reimondo G, Chiodini I, et al. Screening of Cushing's syndrome in outpatients with type 2 diabetes: results of a prospective multicentric study in Italy. *J Clin Endocrinol Metab*. 2012;97(10):3467–3475.
- Debono M, Bradburn M, Bull M, Harrison B, Ross RJ, Newell-Price J. Cortisol as a marker for increased mortality in patients with incidental adrenocortical adenomas. *J Clin Endocrinol Metab*. 2014;99(12):4462–4470.
- Di Dalmazi G, Vicennati V, Garelli S, et al. Cardiovascular events and mortality in patients with adrenal incidentalomas that are either non-secreting or associated with intermediate phenotype or subclinical Cushing's syndrome: a 15-year retrospective study. *Lancet Diabetes Endocrinol*. 2014;2(5):396–405.
- Patrova J, Kjellman M, Wahrenberg H, Falhammar H. Increased mortality in patients with adrenal incidentalomas and autonomous cortisol secretion: a 13-year retrospective study from one center. *Endocrine*. 2017;58(2):267–275.
- Terzolo M, Reimondo G. Insights on the natural history of adrenal incidentalomas. *Ann Intern Med*. 2019;171(2):135–136.
- Il diabete in Piemonte. <http://www.byterfly.eu/islandora/object/liblib%3A301055#mode/2up>. Accessed December 04, 2019.



22. Sanità e Salute. Istituto Nazionale di Statistica. Italian National Institute of Statistics. <https://www.istat.it/it/files/2018/12/C04.pdf>. Accessed December 04, 2019.
23. Hammarstedt L, Muth A, Wängberg B, et al; Adrenal Study Group of Western Sweden. Adrenal lesion frequency: a prospective, cross-sectional CT study in a defined region, including systematic re-evaluation. *Acta Radiol*. 2010;51(10):1149–1156.
24. Grossman A, Koren R, Tirosh A, et al. Prevalence and clinical characteristics of adrenal incidentalomas in potential kidney donors. *Endocr Res*. 2016;41(2):98–102.
25. Davenport C, Liew A, Doherty B, et al. The prevalence of adrenal incidentaloma in routine clinical practice. *Endocrine*. 2011;40(1):80–83.
26. Barzon L, Sonino N, Fallo F, Palu G, Boscaro M. Prevalence and natural history of adrenal incidentalomas. *Eur J Endocrinol*. 2003;149(4):273–285.
27. Benitah N, Yeh BM, Qayyum A, Williams G, Breiman RS, Coakley FV. Minor morphologic abnormalities of adrenal glands at CT: prognostic importance in patients with lung cancer. *Radiology*. 2005;235(2):517–522.
28. Ahn SH, Kim JH, Baek SH, et al. Characteristics of adrenal incidentalomas in a large, prospective computed tomography-based multicenter study: the COAR Study in Korea. *Yonsei Med J*. 2018;59(4):501–510.
29. Kim J, Bae KH, Choi YK, et al. Clinical characteristics for 348 patients with adrenal incidentaloma. *Endocrinol Metab (Seoul)*. 2013;28(1):20–25.
30. Sydney GI, Ioakim KJ, Paschou SA. Insulin resistance and adrenal incidentalomas: a bidirectional relationship. *Maturitas*. 2019;121:1–6.
31. Reincke M, Fassnacht M, Vähä S, Mora P, Allolio B. Adrenal incidentalomas: a manifestation of the metabolic syndrome? *Endocr Res*. 1996;22(4):757–761.
32. Muscogiuri G, Sorice GP, Priolella A, et al. The size of adrenal incidentalomas correlates with insulin resistance. Is there a cause-effect relationship? *Clin Endocrinol (Oxf)*. 2011;74(3):300–305.
33. Wu S, Boyer CM, Whitaker RS, et al. Tumor necrosis factor alpha as an autocrine and paracrine growth factor for ovarian cancer: monokine induction of tumor cell proliferation and tumor necrosis factor alpha expression. *Cancer Res*. 1993;53(8):1939–1944.
34. Campbell PT, Newton CC, Patel AV, Jacobs EJ, Gapstur SM. Diabetes and cause-specific mortality in a prospective cohort of one million U.S. adults. *Diabetes Care*. 2012;35(9):1835–1844.
35. Duan W, Shen X, Lei J, et al. Hyperglycemia, a neglected factor during cancer progression. *Biomed Res Int*. 2014;2014:461917.
36. Lopez D, Luque-Fernandez MA, Steele A, Adler GK, Turchin A, Vaidya A. “Nonfunctional” adrenal tumors and the risk for incident diabetes and cardiovascular outcomes: a cohort study. *Ann Intern Med*. 2016;165(8):533–542.
37. Morelli V, Arosio M, Chiodini I. Cardiovascular mortality in patients with subclinical Cushing. *Ann Endocrinol (Paris)*. 2018;79(3):149–152.
38. Elhassan YS, Alahdab F, Prete A, et al. Natural history of adrenal incidentalomas with and without mild autonomous cortisol excess: a systematic review and meta-analysis. *Ann Intern Med*. 2019;171(2):107–116.
39. Hiroi N, Sue M, Yoshihara A, et al. Prevalence of adrenal masses in Japanese patients with type 2 diabetes mellitus. *Diabetol Metab Syndr*. 2010;2:71.
